# Supplementary material for: Magnetic vitrimer-based soft robotics
Source: Royal Society of Chemistry journal article supplement (doi:10.1039/d2sm00893a), 2022-01-01
Supplement: d2sm00893a1.pdf [file d2sm00893a1.pdf]

## **Supplementary Material**

### **Magnetic Vitrimer-Based Soft Robotics**

Gaoweiang Dong <sup>a</sup>, Qiguang He <sup>b</sup> and Shengqiang Cai\* <sup>a</sup>

<sup>a</sup> Department of Mechanical and Aerospace Engineering, University of California, San Diego, La Jolla, CA 92093, USA

<sup>b</sup> Mechanical Engineering and Applied Mechanics Department, University of Pennsylvania, Philadelphia, 19104, USA

\*Corresponding author: E-mail: [shqcai@ucsd.edu](mailto:shqcai@ucsd.edu)

#### **The PDF file includes:**

Supplementary Figures S1-S6

#### **Other supplementary material for this manuscript includes the following:**

Video1\_penetrate and shape morphing

Video2\_self heal

Video3\_catch and release

Video4\_weld-transfer-unweld

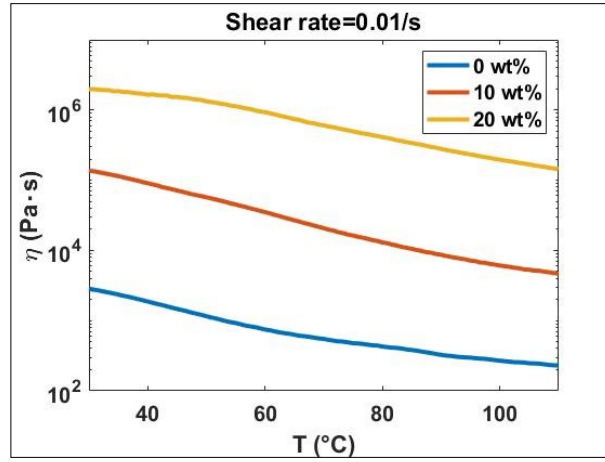

**Figure S1.** Viscosity ( $\eta$ ) of MV with different magnetic particle loading as a function of temperature ( $T$ ).

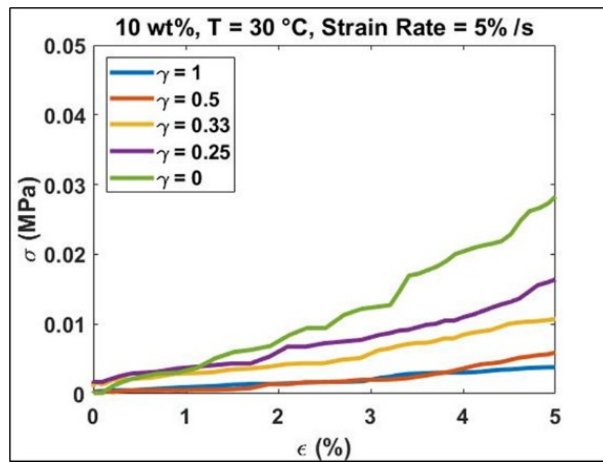

**Figure S2.** Zoom-in of Figure 3B, from which we calculated the secant modulus at 5% strain.

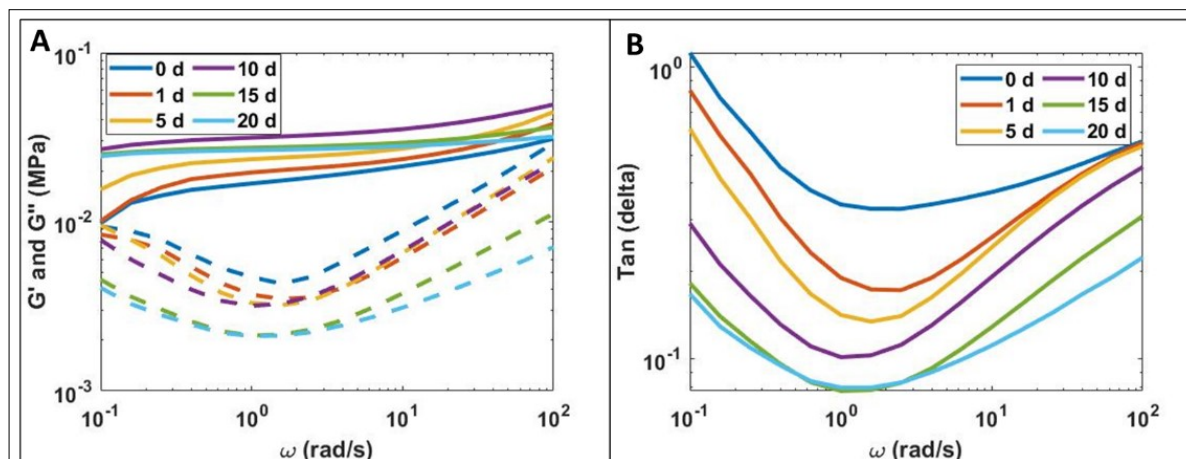

**Figure S3.** Viscoelastic properties of magnetic vitrimer stored for different period of times. A) Storage modulus ( $G'$ , solid line), loss modulus ( $G''$ , dash line) and B)  $\text{Tan}(\delta)$  of vitrimer varied as a function of angular frequency ( $\omega$ ) from 0.1 to 100 rad/s at a strain level of 1%,  $T = 30^\circ\text{C}$ .

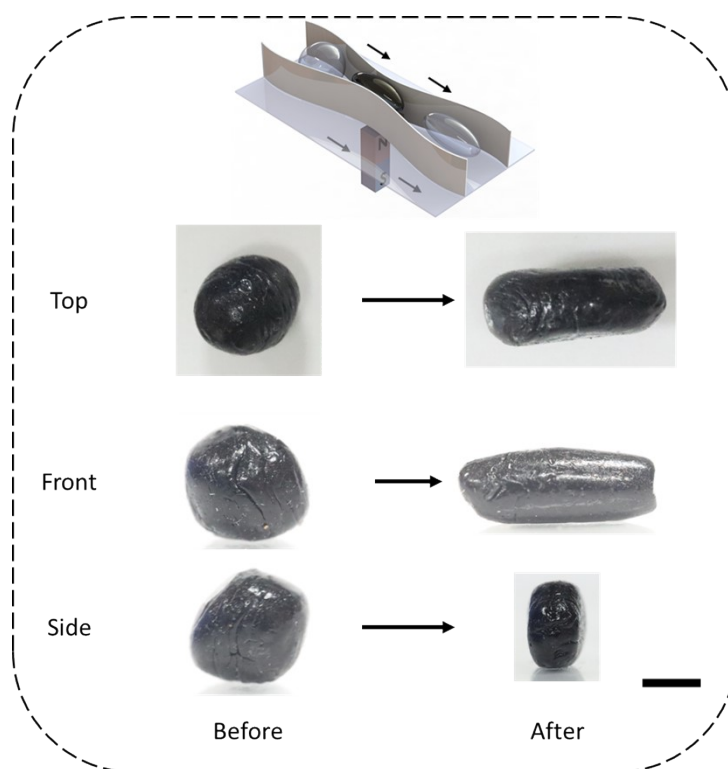

**Figure S4.** Dimensions of a spherical MV before and after passing through a narrow opening. Scale bar, 2 mm.

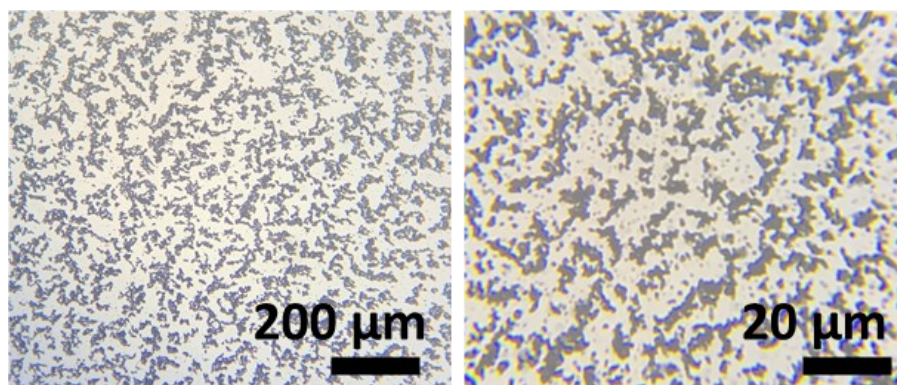

**Figure S5.** Microscopic images of MV mixed 10 wt% iron oxide particles. The images were taken from OMAX 40X-2000X optical microscope. The images show homogenous distribution of the iron oxide particles within the vitrimer polymer matrix.

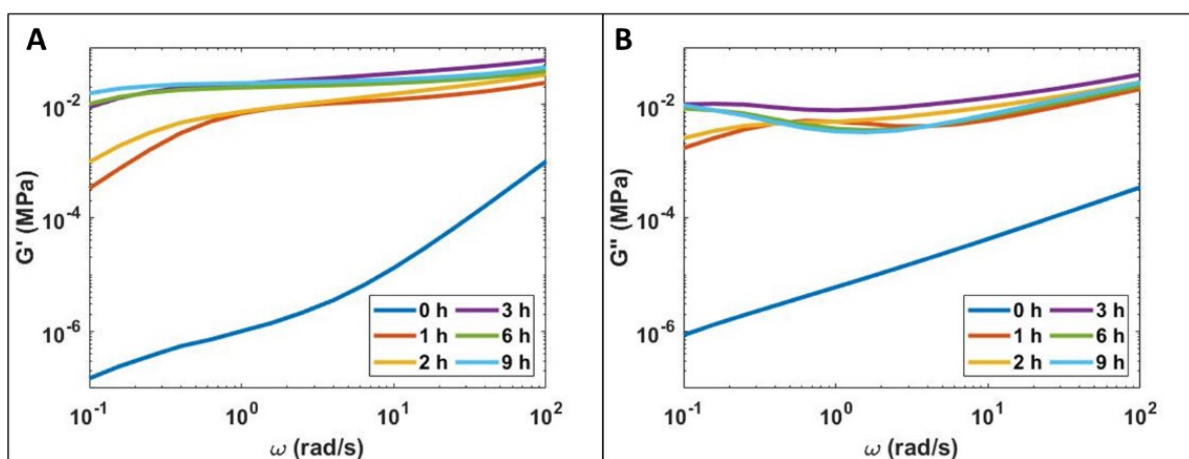

**Figure S6.** Rheological properties of magnetic vitrimer for different period of times of crosslinking. A) Storage modulus ( $G'$ ) and B) loss modulus ( $G''$ ) of vitrimer varied as a function of angular frequency ( $\omega$ ) from 0.1 to 100 rad/s at a strain level of 1%,  $T = 30^\circ\text{C}$ .
